# Supplementary material for: Metabolic Alterations to the Mucosal Microbiota in Inflammatory Bowel Disease
Source: Oxford University Press journal article supplement (doi:10.1097/mib.0000000000000011), 2014-02-28
Supplement: ibd_2014_02_19_loke_13-0799_sdc1.pdf [file ibd_2014_02_19_loke_13-0799_sdc1.pdf]

| <b>Supplemental Table 1:</b>   | <b>UC</b>     | <b>CD</b>     | <b>VA</b>     |
|--------------------------------|---------------|---------------|---------------|
| <b>Patient characteristics</b> | <b>n = 14</b> | <b>n = 13</b> | <b>n = 27</b> |
| Age, y                         |               |               |               |
| Mean (SD)                      | 41 ± 11       | 38 ± 11       | 61 ± 7        |
| Sex, n (%)                     |               |               |               |
| Male                           | 9 (64)        | 11 (84.6)     | 26 (96.3)     |
| Female                         | 5 (36)        | 2 (15.4)      | 1 (2.7)       |
| BMI (kg/m <sup>2</sup> )       | 25.3 ± 3.9    | 24.1 ± 4.4    | 29.2 ± 5.9    |
| Ethnicity, n (%)               |               |               |               |
| Caucasian                      | 12 (85.7)     | 11 (84.6)     | 8 (29.6)      |
| Hispanic                       | 2 (14.3)      | --            | 8 (29.6)      |
| African American               | --            | --            | 8 (29.6)      |
| East Asian                     | --            | 1 (7.7)       | --            |
| other                          | 1 (7.1)       | 1 (7.7)       | 3 (11.1)      |
| Disease time, y                | 15.6 ± 9.2    | 15.8 ± 11.1   |               |
| Active Meds, n (%)             |               |               |               |
| Azathioprine                   | 2 (14.3)      | 1 (7.7)       |               |
| 6-MP                           | 5 (36.0)      | 4 (30.8)      |               |
| Anti-TNF                       | 2 (14.3)      | 4 (30.8)      |               |
| Mesalamine (5-ASA)             | 11 (78.6)     | 4 (30.8)      |               |
| Corticosteroids                |               | 3 (23.1)      |               |
| Involvement n (%)              |               |               |               |
| Colon                          |               | 11 (84.6)     |               |
| Small Bowel                    |               | 7 (53.8)      |               |
| Perianal                       |               | 4 (30.8)      |               |
| Both small and colon           |               | 7 (53.8)      |               |
