# Supplementary material for: Metabolic Alterations to the Mucosal Microbiota in Inflammatory Bowel Disease
Source: Oxford University Press journal article supplement (doi:10.1097/mib.0000000000000011), 2014-02-28
Supplement: ibd_2014_02_19_loke_13-0799_sdc2.pdf [file ibd_2014_02_19_loke_13-0799_sdc2.pdf]

| <b>Supplementary Table 2:</b>     |               |            |                |
|-----------------------------------|---------------|------------|----------------|
| Tukey's Multiple Comparisons Test |               |            |                |
| Adjusted P value                  |               |            |                |
|                                   | Bacteroidetes | Firmicutes | Proteobacteria |
| Healthy vs. UC                    | 0.563         | 0.897      | 0.639          |
| Healthy vs. CD                    | 0.032         | 0.221      | 0.953          |
| CD vs. UC                         | 0.270         | 0.423      | 0.830          |
