# Supplementary material for: Metabolic Alterations to the Mucosal Microbiota in Inflammatory Bowel Disease
Source: Oxford University Press journal article supplement (doi:10.1097/mib.0000000000000011), 2014-02-28
Supplement: ibd_2014_02_19_loke_13-0799_sdc3.pdf [file ibd_2014_02_19_loke_13-0799_sdc3.pdf]

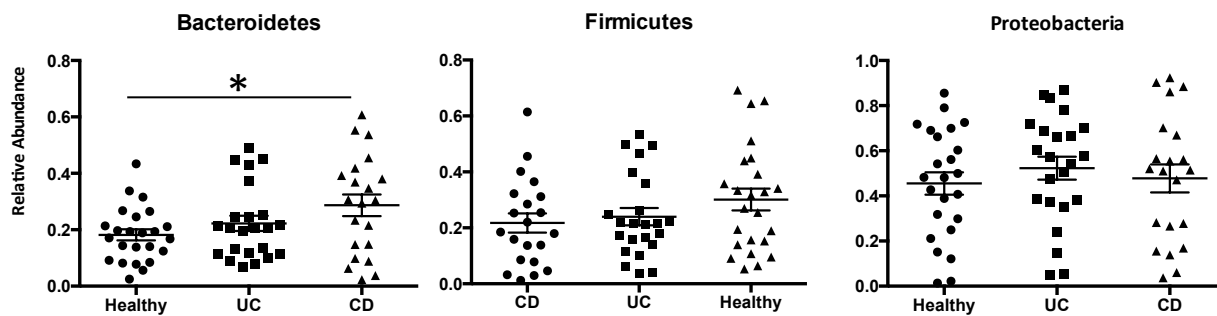

Figure S1: Taxonomic differences at the phylum level of the mucosal microbiota in IBD and healthy patients. Scatterplots showing the relative abundance of the 3 most prevalent bacterial phyla of Bacteroidetes, Firmicutes, and Proteobacteria. Samples from CD patients had a significantly higher proportion of Bacteroidetes compared with healthy control subjects. Although UC and CD biopsies showed slightly decreased abundance of Firmicutes and slightly increased abundance of Proteobacteria, these differences were not statistically significant.
