# Supplementary material for: Metabolic Alterations to the Mucosal Microbiota in Inflammatory Bowel Disease
Source: Oxford University Press journal article supplement (doi:10.1097/mib.0000000000000011), 2014-02-28
Supplement: ibd_2014_02_19_loke_13-0799_sdc5.pdf [file ibd_2014_02_19_loke_13-0799_sdc5.pdf]

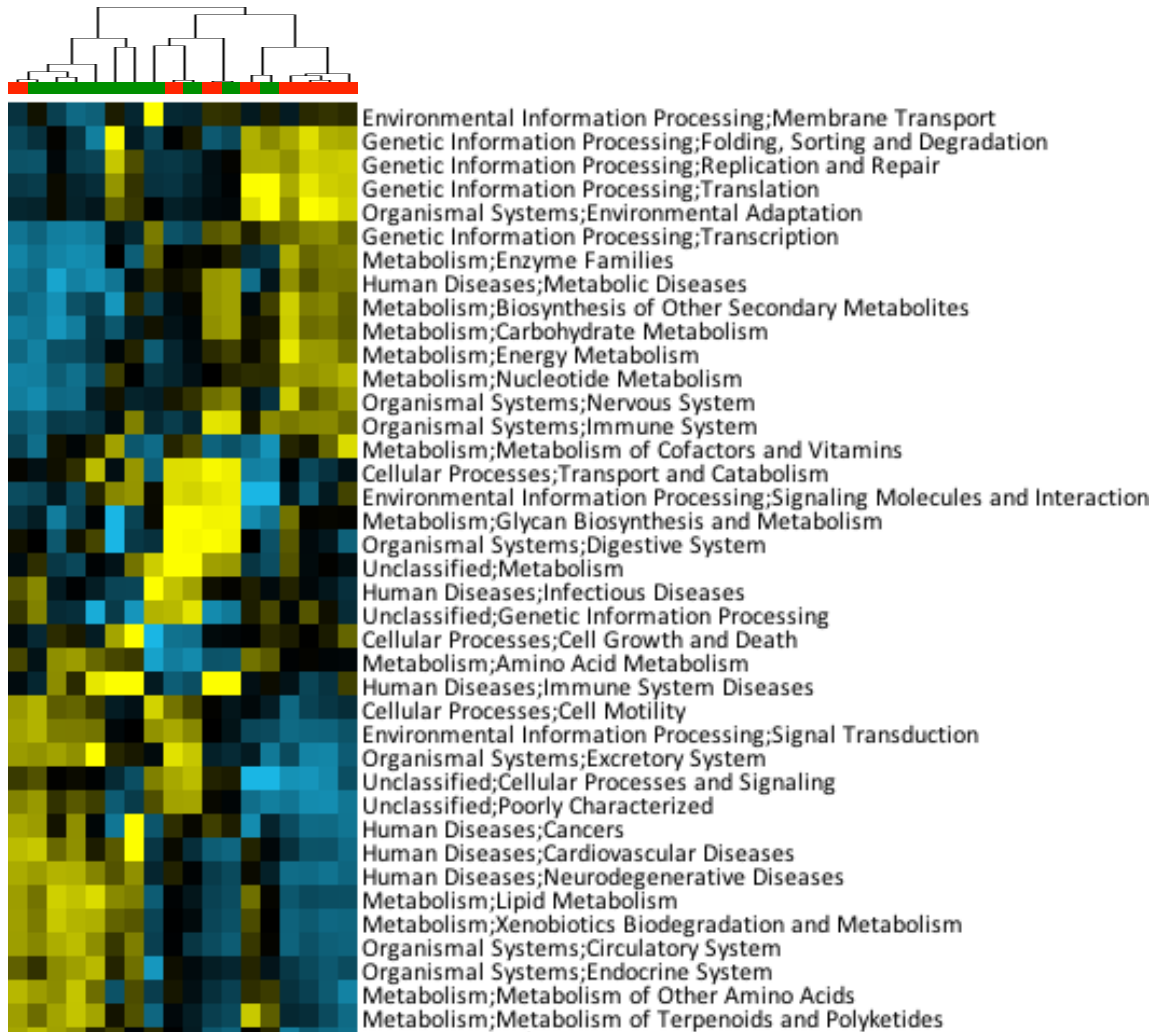

Figure S3: Unsupervised hierarchical clustering analysis on the relative abundance values of KEGG pathways represented from the mucosal microbiota of CD patients. Red = Inflamed. Green = Non-inflamed
